# Supplementary material for: Corrosion Resistance and Thermal Conductivity Enhancement of Reduced Graphene Oxide–BaSO4–Epoxy Composites
Source: MDPI journal article supplement (doi:10.3390/polym14153144), 2022-08-02
Supplement: s1 [file s1]

# Corrosion Resistance and Thermal Conductivity Enhancement of Reduced Graphene Oxide-BaSO<sub>4</sub>-Epoxy Composites

Tung-Yuan Yung<sup>1</sup>, Wen-Fang Lu<sup>1</sup>, Kun-Chao Tsai<sup>1</sup>, Jeng-Shiung Chen<sup>2</sup>, Kwan-Nang Pang<sup>3</sup>, Yu-Chih Tzeng<sup>4</sup>, Hsin-Ming Cheng<sup>5\*</sup>, Po-Tuan Chen<sup>6,\*</sup>

<sup>1</sup> Nuclear Fuels and Materials Division, Institute of Nuclear Energy Research, Taoyuan 325, Taiwan, R.O.C.; romeoyung@yahoo.com (T.-Y.Y.); wflu@iner.gov.tw (W.-F.L.); tsaijohn@iner.gov.tw (K.-C.T.)

<sup>2</sup> Yottadeft Optoelectronics Technology Co., Ltd., Taipei 10460, Taiwan R.O.C.; jsc@yottadeft.com

<sup>3</sup> Institute of Earth Science, Academia Sinica, Taipei, 10591, Taiwan R.O.C.; knpang@earth.sinica.edu.tw

<sup>4</sup> Department of Vehicle Power System Engineering, Chung Cheng Institute of Technology, National Defense University, Taoyuan 335, Taiwan R.O.C.; a0932467761@gmail.com

<sup>5</sup> Department of Electronic Engineering and Organic Electronics Research Center, Ming Chi University of Technology, New Taipei City 243, Taiwan R.O.C.; SMCheng@mail.mcut.edu.tw

<sup>6</sup> Department of Vehicle Engineering, National Taipei University of Technology, Taipei 106, Taiwan R.O.C.; r92222019@ntu.edu.tw

\* Correspondence: SMCheng@mail.mcut.edu.tw (H.-M.C.); r92222019@ntu.edu.tw (P.-T.C.)

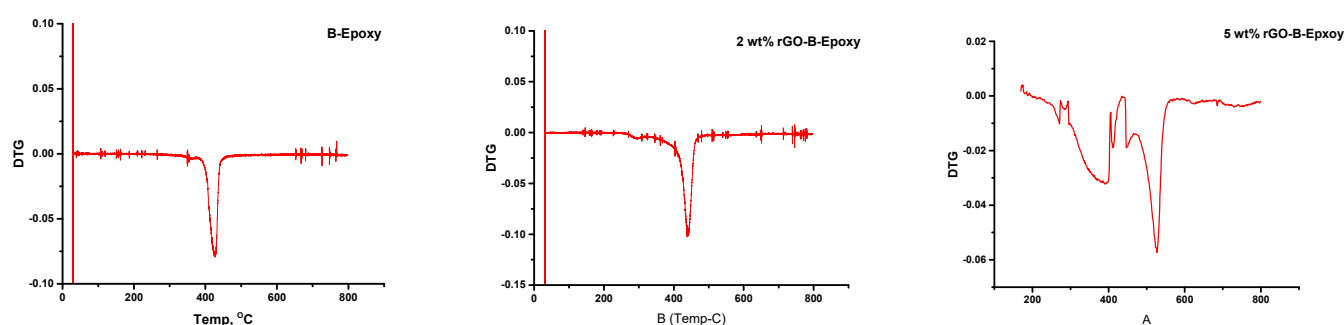

Figure S1. The differential thermal gravimetry (DTG) for B-Epoxy (left), 2wt% rGO-B-Epoxy (middle) and 5 wt% rGO-B-Epoxy (right)

## Reference:

- [30] Zotti, A.; Zuppolini, S.; Borriello, A.; Zarrelli, M. Thermal and mechanical characterization of an aeronautical graded epoxy resin loaded with hybrid nanoparticles. *Nanomater.* **2020**, *10*, 1388.
